# Supplementary material for: Systematic Literature Review and Meta-analysis: Real-World Mucosal Healing in Vedolizumab-Treated Patients with Crohn’s Disease
Source: Hindawi journal article supplement (doi:10.1155/2022/6975416), 2022-02-16
Supplement: f1 [file 6975416.f1.docx]

Review Article Danese et al.

**Systematic literature review and meta-analysis:** **real-world mucosal healing in vedolizumab-treated patients with Crohn’s disease**

**Supplementary Materials**

**Contents**

[Supplementary Table 1. MEDLINE literature search strategy for real-world evidence of mucosal healing with vedolizumab 2](#_Toc94006570)

[Supplementary Table 2. EMBASE literature search strategy for real-world evidence of mucosal healing with vedolizumab 4](#_Toc94006571)

[Supplementary Table 3. Cochrane literature search strategy for real-world evidence of mucosal healing with vedolizumab 6](#_Toc94006572)

[Supplementary Table 4. EMBASE conference abstracts: literature search strategy for real-world evidence of mucosal healing with vedolizumab 8](#_Toc94006573)

[Supplementary Table 5. Quality assessment of studies using NIH QA cohort study tool A 10](#_Toc94006574)

[Supplementary Table 6. Patient baseline characteristics for the 36 studies identified in the systematic literature review 11](#_Toc94006575)

[Supplementary Table 7. Studies excluded from MA 12](#_Toc94006576)

[Supplementary Materials Reference List 14](#_Toc94006577)

[PRISMA Checklist 17](#_Toc94006578)

# Supplementary Table 1. MEDLINE literature search strategy for real-world evidence of mucosal healing with vedolizumab

**Database: MEDLINE (Search conducted January 29, 2020)
Limits: 2014 to present; English; Humans; No comments, letters, or editorials**

| Search no. | Search terms | No. of articles |
| --- | --- | --- |
| **Disease** | |  |
| #1 | "Inflammatory Bowel Diseases"[Mesh] OR "Crohn Disease"[Mesh] OR “Crohn’s Disease”[Text Word] OR “Crohns Disease”[Text Word] OR “Crohn Disease”[Text Word] OR “Crohn’s Enteritis”[Text Word] OR “Regional Enteritis”[Text Word] OR “Granulomatous Enteritis”[Text Word] OR ileocolitis[Text Word] OR “Granulomatous Colitis”[Text Word] OR “Terminal ileitis”[Text Word] OR “regional ileitis”[Text Word] OR “regional ileitides”[Text Word] OR “cleron disease”[Text Word] OR “enteritis regionalis”[Text Word] OR “morbus crohn”[Text Word] OR “regional enterocolitis”[Text Word] OR “inflammatory bowel disease”[Text Word] OR “inflammatory bowel diseases”[Text Word] OR “Crohn ileitis”[Text Word] OR “Crohn's ileitis”[Text Word] OR “Crohns ileitis”[Text Word] | **29,508** |
| **Treatment** | |  |
| #2 | #1 AND (“vedolizumab”[Supplementary Concept] OR vedolizumab[Text Word] OR entyvio[Text Word] OR MLN0002[Text Word] OR “LDP 02”[Text Word] OR LDP02[Text Word] OR “MLN 0002”[Text Word] OR “MLN 02”[Text Word] OR MLN02[Text Word]) | **655** |
| **Study type** | |  |
| #3 | #2 AND (“Epidemiologic Studies”[Mesh] OR “Case-Control Studies”[Mesh] OR “Cohort Studies”[Mesh] OR “Cross-Sectional Studies”[Mesh] OR “Prospective Studies”[Mesh] OR review*[Title] OR epidemiologic stud*[Title/Abstract] OR “case control”[Title/Abstract] OR cohort stud*[Title/Abstract] OR “cross sectional”[Title/Abstract] OR cohort analys*[Title/Abstract] OR “follow up study”[Title/Abstract] OR “follow up studies”[Title/Abstract] OR longitudinal[Title/Abstract] OR retrospective[Title/Abstract] OR prospective[Title/Abstract] OR observational stud*[Title/Abstract] OR adverse effect*[Title/Abstract] OR “Review”[Publication Type] OR “Systematic Review”[Publication Type] OR “Observational Study”[Publication Type] OR “Multicenter Study”[Publication Type] OR "case record review"[Abstract] OR "chart review"[Abstract] OR "medical records review"[Abstract] OR "record review"[Abstract] OR "records review"[Abstract] OR "retrospective record review"[Abstract] OR "real-world study"[Title/Abstract] OR "real-world studies"[Title/Abstract] OR “Real-world data”[Title/Abstract] OR “Real-world evidence”[Title/Abstract]) | **394** |
| **Exclusions** | |  |
| #4 | “Animals”[Mesh] NOT “Humans”[Mesh] | **602,078** |
| #5 | Comment”[Publication Type] OR “Letter”[Publication Type] OR “Editorial”[Publication Type] | **458,823** |
| **Total** | | |
| #6 | (#3 NOT (#4 OR #5)) | **388** |

# Supplementary Table 2. EMBASE literature search strategy for real-world evidence of mucosal healing with vedolizumab

**Database: EMBASE (Search conducted January 29, 2020)
Limits: 2014 to present; English; Humans; No comments, letters, editorials, or conference abstracts**

| Search no. | Search terms | No. of articles |
| --- | --- | --- |
| **Disease** | |  |
| #1 | ('inflammatory bowel disease'/exp OR 'crohn disease'/exp OR 'crohns disease':de,ab,ti OR 'crohn disease':de,ab,ti OR 'crohns enteritis':de,ab,ti OR 'granulomatous enteritis':de,ab,ti OR 'regional enteritis':de,ab,ti OR ileocolitis:de,ab,ti OR 'granulomatous colitis':de,ab,ti OR 'terminal ileitis':de,ab,ti OR 'regional ileitis':de,ab,ti OR 'regional ileitides':de,ab,ti OR 'cleron disease':de,ab,ti OR 'enteritis regionalis':de,ab,ti OR 'morbus crohn':de,ab,ti OR 'regional enterocolitis':de,ab,ti OR 'inflammatory bowel disease':de,ab,ti OR 'inflammatory bowel diseases':de,ab,ti OR 'crohn ileitis':de,ab,ti OR 'crohns ileitis':de,ab,ti) AND [english]/lim AND [embase]/lim AND [2014-2020]/py | **64,765** |
| **Treatment** | |  |
| #2 | #1 AND ('vedolizumab'/exp OR vedolizumab:de,ab,ti OR entyvio:de,ab,ti OR mln0002:de,ab,ti OR 'ldp 02':de,ab,ti OR ldp02:de,ab,ti OR 'mln 0002':de,ab,ti OR 'mln 02':de,ab,ti OR mln02:de,ab,ti) AND [english]/lim AND [embase]/lim AND [2014-2020]/py | **2,622** |
| **Study type** | |  |
| #3 | #2 AND ('epidemiology'/de OR 'case control study'/exp OR 'cohort analysis'/de OR 'cross-sectional study'/de OR 'case study'/de OR 'follow up'/de OR 'longitudinal study'/de OR 'retrospective study'/de OR 'prospective study'/de OR 'observational study'/de OR 'correlational study'/de OR epidemiologic:ti,ab OR 'case control':ti,ab OR 'case referent':ti,ab OR ((case NEXT/1 stud*):ti,ab) OR 'case series':ti,ab OR cohort*:ti,ab OR 'cross sectional':ti,ab OR 'follow up':ti,ab OR longitudinal:ti,ab OR retrospective*:ti,ab OR prospective*:ti,ab OR observational:ti,ab OR ((adverse NEXT/1 effect*):ti,ab) OR 'controlled before and after':ti,ab OR 'interrupted times series':ti,ab OR correlational:ti,ab OR ((ecological NEXT/1 stud*):ti,ab) OR ((descriptive NEXT/1 stud*):ti,ab) OR 'review'/exp OR 'systematic review'/exp OR 'multicenter study'/exp OR 'medical record review'/exp OR 'medical record review':ti,ab OR 'chart review':ti,ab OR 'medical records review':ti,ab OR 'record review':ti,ab OR 'records review':ti,ab OR 'retrospective record review':ti,ab OR 'real world evidence'/exp OR 'real world data'/exp OR 'real world evidence':ti,ab OR 'real world data':ti,ab OR 'real-world studies':ti,ab OR 'real-world study':ti,ab) AND [english]/lim AND [embase]/lim AND [2014-2020]/py | **1,781** |
| **Exclusions** | |  |
| #4 | 'animal'/exp NOT 'human'/exp AND [english]/lim AND [embase]/lim AND [2014-2020]/py | **800,583** |
| #5 | (comment*:ti OR letter:it OR editorial:it OR [conference abstract]/lim OR [conference paper]/lim OR ‘conference abstract’:it OR ‘conference paper’:it) AND [english]/lim AND [embase]/lim AND [2014-2020]/py | **2,511,128** |
| **Total** | | |
| #6 | (#3 NOT (#4 OR #5)) | **790** |

# Supplementary Table 3. Cochrane literature search strategy for real-world evidence of mucosal healing with vedolizumab

**Database: Cochrane (Search conducted January 29, 2020)
Limits: 2014 to present; English; Humans; No comments, letters, or editorials**

| Search no. | Search terms | No. of articles |
| --- | --- | --- |
| **Disease** | |  |
| #1 | MeSH descriptor: [Inflammatory Bowel Diseases] explode all trees | **2,995** |
| #2 | MeSH descriptor: [Crohn Disease] explode all trees | **1,444** |
| #3 | (“Crohn’s Disease” OR “Crohns Disease” OR “Crohn Disease” OR “Crohn’s Enteritis” OR “Regional Enteritis” OR “Granulomatous Enteritis” OR ileocolitis OR “Granulomatous Colitis” OR “Terminal ileitis” OR “regional ileitis” OR “regional ileitides” OR “cleron disease” OR “enteritis regionalis” OR “morbus crohn” OR “regional enterocolitis” OR “inflammatory bowel disease” OR “inflammatory bowel diseases” OR “Crohn ileitis” OR “Crohn's ileitis” OR “Crohns ileitis”):ti,ab,kw | **6,486** |
| #4 | [OR #1-#3] | **7,501** |
| **Treatment** | |  |
| #5 | (vedolizumab OR entyvio OR MLN0002 OR “LDP 02” OR LDP02 OR “MLN 0002” OR “MLN 02” OR MLN02):ti,ab,kw | **387** |
| #6 | #4 AND #5 | **275** |
| **Study type** | |  |
| #7 | (epidemiologic OR “case control” OR “case referent” OR case NEXT stud* OR “case series” OR cohort* OR “cross sectional” OR “follow up” OR longitudinal OR retrospective* OR prospective* OR observational OR adverse NEXT effect* OR “controlled before and after” OR “interrupted time series” OR correlational OR ecological NEXT stud* OR descriptive NEXT stud*):ti,ab,kw OR (“Review” OR “Systematic Review” OR “Observational Study” OR “Multicenter Study”):pt OR ("case record review" OR "chart review" OR "medical records review" OR "record review" OR "records review" OR "retrospective record review" OR "real-world study" OR "real-world studies" OR “Real-world data” OR “Real-world evidence”):ti,ab,kw | **606,631** |
| #8 | #6 AND #7 | **149** |
| **Exclusions** | |  |
| #9 | MeSH descriptor: [Animals] explode all trees | **15,740** |
| #10 | MeSH descriptor: [Humans] explode all trees | **8,454** |
| #11 | #9 NOT #10 | **7,286** |
| #12 | (“Comment” OR “Letter” OR “Editorial”):pt | **14,542** |
| **Total (with date limits)** | | |
| #13 | #14 NOT (#17 OR #18) | **149** |
| #14 | #13 NOT “conference abstract” | **58** |
| #15 | #14 AND Publication date from 2014/01/01 | **51** |

# Supplementary Table 4. EMBASE conference abstracts: literature search strategy for real-world evidence of mucosal healing with vedolizumab

**Database: EMBASE - Conference abstractsa (Search conducted January 29, 2020)
Limits: 2018 to present; English; Humans; No comments, letters, or editorials**

| Search no. | Search terms | No. of articles |
| --- | --- | --- |
| **Disease** | |  |
| #1 | ('inflammatory bowel disease'/exp OR 'crohn disease'/exp OR 'crohns disease':de,ab,ti OR 'crohn disease':de,ab,ti OR 'crohns enteritis':de,ab,ti OR 'granulomatous enteritis':de,ab,ti OR 'regional enteritis':de,ab,ti OR ileocolitis:de,ab,ti OR 'granulomatous colitis':de,ab,ti OR 'terminal ileitis':de,ab,ti OR 'regional ileitis':de,ab,ti OR 'regional ileitides':de,ab,ti OR 'cleron disease':de,ab,ti OR 'enteritis regionalis':de,ab,ti OR 'morbus crohn':de,ab,ti OR 'regional enterocolitis':de,ab,ti OR 'inflammatory bowel disease':de,ab,ti OR 'inflammatory bowel diseases':de,ab,ti OR 'crohn ileitis':de,ab,ti OR 'crohns ileitis':de,ab,ti) AND [english]/lim AND [embase]/lim AND [2014-2020]/py | **64,765** |
| **Treatment** | |  |
| #2 | #1 AND (‘vedolizumab’/exp OR vedolizumab:de,ab,ti OR entyvio:de,ab,ti OR mln0002:de,ab,ti OR ‘ldp 02’:de,ab,ti OR ldp02:de,ab,ti OR ‘mln 0002’:de,ab,ti OR ‘mln 02’:de,ab,ti OR mln02:de,ab,ti) AND [english]/lim AND [embase]/lim AND [2014-2020]/py | **2,622** |
| **Study type** | |  |
| #3 | #2 AND ('epidemiology'/de OR 'case control study'/exp OR 'cohort analysis'/de OR 'cross-sectional study'/de OR 'case study'/de OR 'follow up'/de OR 'longitudinal study'/de OR 'retrospective study'/de OR 'prospective study'/de OR 'observational study'/de OR 'correlational study'/de OR epidemiologic:ti,ab OR 'case control':ti,ab OR 'case referent':ti,ab OR ((case NEXT/1 stud*):ti,ab) OR 'case series':ti,ab OR cohort*:ti,ab OR 'cross sectional':ti,ab OR 'follow up':ti,ab OR longitudinal:ti,ab OR retrospective*:ti,ab OR prospective*:ti,ab OR observational:ti,ab OR ((adverse NEXT/1 effect*):ti,ab) OR 'controlled before and after':ti,ab OR 'interrupted times series':ti,ab OR correlational:ti,ab OR ((ecological NEXT/1 stud*):ti,ab) OR ((descriptive NEXT/1 stud*):ti,ab) OR 'review'/exp OR 'systematic review'/exp OR 'multicenter study'/exp OR 'medical record review'/exp OR 'medical record review':ti,ab OR 'chart review':ti,ab OR 'medical records review':ti,ab OR 'record review':ti,ab OR 'records review':ti,ab OR 'retrospective record review':ti,ab OR 'real world evidence'/exp OR 'real world data'/exp OR 'real world evidence':ti,ab OR 'real world data':ti,ab OR 'real-world studies':ti,ab OR 'real-world study':ti,ab) AND [english]/lim AND [embase]/lim AND [2014-2020]/py | **1,781** |
| **Exclusions** | |  |
| #4 | 'animal'/exp NOT 'human'/exp AND [english]/lim AND [embase]/lim AND [2014-2020]/py | **800,583** |
| #5 | (comment*:ti OR letter:it OR editorial:it) AND [english]/lim AND [embase]/lim AND [2014-2020]/py | **376,963** |
| **Total** | | |
| #6 | (#3 NOT (#4 OR #5)) | **1,745** |
| #7 | #6 AND ([conference abstract]/lim OR [conference paper]/lim OR ‘conference abstract’:it OR ‘conference paper’:it) AND [2018-2020]/py | **562** |
| #8 | #7 AND ('2018 advances in inflammatory bowel diseases, aibd 2018':nc OR '2018 crohn`s and colitis congress':nc OR '2018 ddw':nc OR '2019 crohn`s and colitis congress':nc OR '2019 ddw':nc OR 'ddw 2018 - digestive disease week':nc OR 'world congress of gastroenterology 2019':nc OR 'european crohn`s and colitis organization 2018':nc OR 'ecco 2018':nc OR 'european crohn`s and colitis organization 2019':nc OR 'ecco 2019':nc OR 'united european gastroenterology week 2018':nc OR 'uegw 2018':nc OR 'united european gastroenterology week 2019':nc OR 'uegw 2019':nc OR 'american college of gastroenterology':nc OR acg:nc) | **389** |

aAbstracts from the following 2018–2019 society meetings were searched, regardless of whether abstracts were available during the search of EMBASE conference abstracts: Crohn’s and Colitis Congress; Advances in Inflammatory Bowel Disease Conference; World Congress of Gastroenterology; Digestive Disease Week; European Crohn’s and Colitis Organization; United European Gastroenterology Week; American College of Gastroenterology.

# Supplementary Table 5. Quality assessment of studies using NIH QA cohort study tool A

**a Studies included in the systematic literature review**

| **NIH QA questionnaire (abbreviated)** | **Number of studies with ratings  (N = 36)** | | | |
| --- | --- | --- | --- | --- |
| **Yes** | **No** | **NR** | **NA** |
| Study objective(s) stated | 35 | 1 | — | — |
| Population specified | 36 | — | — | — |
| Participation ≥50% of the eligible patients | 20 | 12 | 4 | — |
| Inclusion/exclusion criteria specified | 36 | — | — | — |
| Sample size justification/power description provided | — | — | — | 36 |
| Exposure(s) of interest measured prior to the outcome(s) being measured | 36 | — | — | — |
| Time frame sufficient to see an association between exposure and outcome | 36 | — | — | — |
| Different exposure levels as related to outcomes examined | 12 | 24 | — | — |
| Exposure measures defined and consistently implemented across participants | 36 | — | — | — |
| Exposures assessed more than once over time | — | — | — | 36 |
| Outcome measures clearly defined and consistently implemented across participants | 33 | 3 | — | — |
| Assessors blinded | 1 | — | — | 35 |
| Loss to follow-up ≤20% | 2 | — | 34 | — |
| Confounding variables measured and adjusted statistically | — | 36 | — | — |

**b Studies included in the meta-analysis**

| **NIH QA questionnaire (abbreviated)** | **Number of studies with ratings  (N = 15)** | | | |
| --- | --- | --- | --- | --- |
| **Yes** | **No** | **NR** | **NA** |
| Study objective(s) stated | 14 | 1 | — | — |
| Population specified | 15 | — | — | — |
| Participation ≥50% of the eligible patients | 8 | 6 | 1 | — |
| Inclusion/exclusion criteria specified | 15 | — | — | — |
| Sample size justification/power description provided | — | — | — | 15 |
| Exposure(s) of interest measured prior to the outcome(s) being measured | 15 | — | — | — |
| Time frame sufficient to see an association between exposure and outcome | 15 | — | — | — |
| Different exposure levels as related to outcomes examined | 5 | 10 | — | — |
| Exposure measures defined and consistently implemented across participants | 15 | — | — | — |
| Exposures assessed more than once over time | — | — | — | 15 |
| Outcome measures clearly defined and consistently implemented across participants | 15 | — | — | — |
| Assessors blinded | 1 | — | — | 14 |
| Loss to follow-up ≤20% | 1 | — | 14 | — |
| Confounding variables measured and adjusted statistically | — | 15 | — | — |

NA, not applicable; NIH, National Institutes of Health; NR, not reported; QA, quality assessment.

# Supplementary Table 6. Patient baseline characteristics for the 36 studies identified in the systematic literature review

| **Baseline characteristics** | **No. of studies reporting data** | **Unit** | **Comments** |
| --- | --- | --- | --- |
| Age at baseline | 16 | Median, yrs | Range, 29.0–49.5 |
| Age at diagnosis | 5 | Median, yrs | Range, 21.0–32.0 |
| Disease duration | 15 | Median, yrs | Range, 2.4–19.5 |
| Male | 27 | % | Range, 20.8–70.0 |
| Smoking status | 21 | % | 12 reported active smoking: 3.3–30.0 |
| Baseline disease location | 23 | % | - Ileal: 0–66.6 - Colonic: 4–31.9 - Ileocolonic: 16.6–86 - Upper GI: 1.3–15 |
| Baseline disease behavior | 25 | % | - Stricturing disease: 21.3–48.0 - Penetrating disease: 10.3–50.0 - Perianal disease: 12–46 |
| Baseline extraintestinal manifestation | 6 | % | 27–52 |
| CD-related surgery | 14 | % | 6.2–77.0 |
| Concomitant treatment | 24 |  | - Corticosteroids - Immunomodulators |
| Prior medication usage | 27 |  |  |
| Steroids | 3 | % | - Steroid-dependent/steroid-refractory (n = 2): 31–41 - Steroid treatment (n = 1): 95.6 |
| Immunomodulators | 5 | % | ≤97.5 |
| Biologics | 27 | % | - Infliximab (n = 4): 15.5–75.0 - Adalimumab (n = 3): 15.5–68.0 - Ustekinumab (n = 1): 17 - anti-TNF (n = 1): 62.2–99.4 |

anti-TNF, antitumor necrosis factor; CD, Crohn’s disease; GI, gastrointestinal.

# Supplementary Table 7. Studies excluded from MA

| **Full reference** | **Exclusion reason** | **Details on timepoint** |
| --- | --- | --- |
| 1 Christensen B, Colman RJ, Micic D, Gibson PR, Goeppinger SR, Yarur A, et al. Vedolizumab as induction and maintenance for inflammatory bowel disease: 12-month effectiveness and safety. Inflamm Bowel Dis. 2018 Mar 19;24(4):849-860. | Timepoint not relevant (median) | Median follow-up (range, 5–8) |
| 2 Bor R, Klaudia F, Miheller P, Palatka K, Szamosi T, Vincze A, et al. Efficacy of vedolizumab induction therapy on clinical and endoscopic activity in patients with anti-tumour necrosis factor alpha-resistant inflammatory bowel disease. J Crohns Colitis. 2018;12:S34-S35. | Timepoint not relevant | 14 weeks |
| 3 Bor R, Fabian A, Matuz M, Szepes Z, Farkas K, Miheller P, et al. Real-life efficacy of vedolizumab on endoscopic healing in inflammatory bowel disease - a nationwide Hungarian cohort study. Expert Opin Biol Ther. 2020 Feb;20(2):205-213. | Endpoint data not of interest: SES-CD ≤4 | 14, 22, and 52 weeks |
| 4 Bor R, Farkas K, Miheller P, Palatka K, Palatka K, Szamosi T, et al. Short- and long-term efficacy of vedolizumab therapy on clinical and endoscopic activity in patients with anti-tumor necrosis factor alpha resistant inflammatory bowel disease. United European Gastroenterol J. 2019;7:P1810. | Secondary reference |  |
| 5 Tursi A, Mocci G, Faggiani R, Allegretta L, Valle ND, Medici A, et al. Vedolizumab is effective and safe in real-life treatment of inflammatory bowel diseases outpatients: a multicenter, observational study in primary inflammatory bowel disease centers. Eur J Intern Med. 2019 Aug;66:85-91. | Timepoint (details not available) | Not reported |
| 6 Bots S, Van Baalen E, De Boer N, Gecse K, Ponsioen C, D'Haens G, et al. Clinical effectiveness of vedolizumab in a tertiary care cohort of IBD patients. J Crohns Colitis. 2018;12:S294-S295. | Endpoint data not of interest: no results provided separately for SES-CD to Rutgeerts | Median time to colonoscopy, 40 weeks |
| 7 Dragoni G, Bagnoli S, Le Grazie M, Campani C, Rogai F, Manetti N, et al. Long-term efficacy and safety of vedolizumab in patients with inflammatory bowel diseases: a real-life experience from a tertiary referral center. J Dig Dis. 2019 May;20(5):235-242. | Endpoint data not of interest: Rutgeerts | 52 weeks |
| 8 Amiot A, Serrero M, Peyrin-Biroulet L, Filippi J, Pariente B, Roblin X, et al. Three-year effectiveness and safety of vedolizumab therapy for inflammatory bowel disease: a prospective multi-centre cohort study. Aliment Pharmacol Ther. 2019 Jul;50(1):40-53. | Timepoint not relevant | 54–162 weeks |
| 9 Noman M, Ferrante M, Bisschops R, De Hertogh G, Van den Broeck K, Rans K, et al. Vedolizumab induces long-term mucosal healing in patients with Crohn's disease and ulcerative colitis. J Crohns Colitis. 2017 Sep 1;11(9):1085-1089. | Timepoint not relevant | >52 weeks and at median of 33 months |
| 10 Dulai PS, Singh S, Jiang X, Peerani F, Narula N, Chaudrey K, et al. The real-world effectiveness and safety of vedolizumab for moderate-severe Crohn's disease: results from the US VICTORY consortium. Am J Gastroenterol. 2016 Aug;111(8):1147-55. | Duplicate for data in Koliani-Pace publication | At 6 months and 12 months of maintenance therapy |
| 11 Vivio EE, Kanuri N, Gilbertsen JJ, Monroe K, Dey N, Chen CH, et al. Vedolizumab effectiveness and safety over the first year of use in an IBD clinical practice. J Crohns Colitis. 2016 Apr;10(4):402-9. | Timepoint not relevant | Weeks 0, 2, 6, and 14 |
| 12 Gan ATM, Chan WPW, Ling KL, Hartono LJ, Ong DE, Gowans M, et al. Real-world data on the efficacy and safety of vedolizumab therapy in patients with inflammatory bowel disease: a retrospective nation-wide cohort study in Singapore. J Crohns Colitis. 2019;13:S434-S435. | Timepoint | Median, 37 weeks |
| 13 Bohm M, Sagi S, Fischer M, Kadire S, Tran G, Rahal M, et al. Comparative effectiveness of vedolizumab and tumor necrosis factor-antagonist therapy in Crohn's disease: a multicenter consortium propensity score-matched analysis. Gastroenterology. 2018;154(6):S-369-S-370. | Patient overlap with another study |  |
| 14 Hoffmann P, Krisam J, Stremmel W, Gauss A. Real-world outcomes of vedolizumab therapy in ulcerative colitis and Crohn's disease at a tertiary referral center. Dig Dis. 2019;37(1):33-44. | Limited sample size with results for endpoint of interest <10 |  |
| 15 Crowell KT, Tinsley A, Williams ED, Coates MD, Bobb A, Koltun WA, et al. Vedolizumab as a rescue therapy for patients with medically refractory Crohn's disease. Colorectal Dis. 2018 Oct;20(10):905-912. | Endpoint data not of interest |  |
| 16 Hudesman D, Chang S, Shashi P, Winters A, Chablaney S, Meserve J, et al. Impact of concomitant immunomodulator use on vedolizumab effectiveness: a multicenter consortium propensity score-matched analysis. Gastroenterology. 2018;154(6):S-370-S-371. | Endpoint data not of interest |  |
| 17 Bressler B, Mantzaris G, Silverberg M, Zezos P, Stein D, Colby C, et al. Real-world effectiveness and safety of vedolizumab and anti-TNF in biologic-naive Crohn's disease patients: results from the EVOLVE study. J Crohns Colitis. 2019;13:S427-S428. | Endpoint data not defined |  |
| 18 Chao CY, Restellini S, Lemieux C, Germain P, Bitton A, Lakatos PL, et al. Vedolizumab trough concentrations are associated with endoscopic response in patients with inflammatory bowel disease. J Crohns Colitis. 2018;12:S367-S368. | Endpoint data not of interest |  |
| 19 Guidi L, Pugliese D, Tonucci TP, Bertani L, Costa F, Privitera G, et al. Early vedolizumab trough levels predict treatment persistence over the first year in inflammatory bowel disease. United European Gastroenterol J. 2019 Nov;7(9):1189-1197. | Endpoint data not of interest |  |
| 20 Quatraccioni C, Annulli G, Daretti LM, Antuono S, Calzolari M, Guardati P, et al. Vedolizumab induces deep remission and improves quality of life in patients with inflammatory bowel diseases: the ANCONA experience. United European Gastroenterol J. 2019;7:P1105. | Endpoint data not defined |  |
| 21 Kashani A, Pabla BS, Eaddy A, et al. Effect of disease location on endoscopic and radiographic outcomes in patients with moderate to severe Crohn's disease initiated on vedolizumab: 796. Am J Gastroenterol. 2019;114(2019 ACG Annual Meeting Abstracts):S461. doi: 10.14309/01.ajg.0000592720.36194.0c. | Endpoint data not of interest and timepoint not relevant for MA |  |

MA, meta-analysis; SES-CD, Simple Endoscopic Score for Crohn’s Disease.

# Supplementary Materials Reference List

1. Christensen B, Colman RJ, Micic D, et al. Vedolizumab as induction and maintenance for inflammatory bowel disease: 12-month effectiveness and safety. *Inflamm Bowel Dis.* 2018;24:849-860.

2. Bor R, Klaudia F, Miheller P, et al. DOP007 Efficacy of vedolizumab induction therapy on clinical and endoscopic activity in patients with anti-tumour necrosis factor alpha-resistant inflammatory bowel disease. *J Crohns Colitis.* 2018;12(suppl 1):S034-035.

3. Bor R, Fábián A, Matuz M, et al. Real-life efficacy of vedolizumab on endoscopic healing in inflammatory bowel disease - a nationwide Hungarian cohort study. *Expert Opin Biol Ther.* 2020;20:205-213.

4. Bor R, Farkas K, Miheller P, et al. P1810 Short- and long-term efficacy of vedolizumab therapy on clinical and endoscopic activity in patients with anti-tumor necrosis factor alpha resistant inflammatory bowel disease. *United European Gastroenterol J.* 2019;7(S8):916.

5. Tursi A, Mocci G, Faggiani R, et al. Vedolizumab is effective and safe in real-life treatment of inflammatory bowel diseases outpatients: a multicenter, observational study in primary inflammatory bowel disease centers. *Eur J Intern Med.* 2019;66:85-91.

6. Bots S, van Baalen E, De Boer N, et al. P376 Clinical effectiveness of vedolizumab in a tertiary care cohort of IBD patients. *J Crohns Colitis.* 2018;12(suppl 1):S294-295.

7. Dragoni G, Bagnoli S, Le Grazie M, et al. Long-term efficacy and safety of vedolizumab in patients with inflammatory bowel diseases: a real-life experience from a tertiary referral center. *J Dig Dis.* 2019;20:235-242.

8. Amiot A, Serrero M, Peyrin-Biroulet L, et al; OBSERV-IBD study group; the GETAID. Three-year effectiveness and safety of vedolizumab therapy for inflammatory bowel disease: a prospective multi-centre cohort study. *Aliment Pharmacol Ther.* 2019;50:40-53.

9. Noman M, Ferrante M, Bisschops R, et al. Vedolizumab induces long-term mucosal healing in patients with Crohn's disease and ulcerative colitis. *J Crohns Colitis.* 2017;11:1085-1089.

10. Dulai PS, Singh S, Jiang X, et al. The real-world effectiveness and safety of vedolizumab for moderate-severe Crohn's disease: results from the US VICTORY Consortium. *Am J Gastroenterol.* 2016;111:1147-1155.

11. Vivio EE, Kanuri N, Gilbertsen JJ, et al. Vedolizumab effectiveness and safety over the first year of use in an IBD clinical practice. *J Crohns Colitis.* 2016;10:402-409.

12. Gan ATM, Chan WPW, Ling KL, et al. P634 Real-world data on the efficacy and safety of vedolizumab therapy in patients with inflammatory bowel disease: a retrospective nation-wide cohort study in Singapore. *J Crohns Colitis.* 2019;13(suppl 1):S434-435.

13. Bohm M, Sagi S, Fischer M, Kadire S, Tran G, Rahal M. Sa1723 Comparative effectiveness of vedolizumab and tumor necrosis factor-antagonist therapy in Crohn's disease: a multicenter consortium propensity score-matched analysis. *Gastroenterology.* 2018;154(suppl 1):S369-370.

14. Hoffmann P, Krisam J, Stremmel W, Gauss A. Real-world outcomes of vedolizumab therapy in ulcerative colitis and Crohn's disease at a tertiary referral center. *Dig Dis.* 2019;37:33-44.

15. Crowell KT, Tinsley A, Williams ED, et al. Vedolizumab as a rescue therapy for patients with medically refractory Crohn's disease. *Colorectal Dis.* 2018;20:905-912.

16. Hudesman D, Chang S, Shashi P, et al. Sa1726. Impact of concomitant immunomodulator use on vedolizumab effectiveness: a multicenter consortium propensity score-matched analysis. *Gastroenterology.* 2018;154(suppl 1):S370-371.

17. Bressler B, Mantzaris G, Silverberg M, et al. P621 Real-world effectiveness and safety of vedolizumab and anti-TNF in biologic-naive Crohn’s disease patients: results from the EVOLVE study. *J Crohns Colitis.* 2019;13(suppl 1):S427-428.

18. Chao CY, Restellini S, Lemieux C, et al. P518 Vedolizumab trough concentrations are associated with endoscopic response in patients with inflammatory bowel disease. *J Crohns Colitis.* 2018;12(suppl 1):S367-368.

19. Guidi L, Pugliese D, Panici Tonucci T, et al. Early vedolizumab trough levels predict treatment persistence over the first year in inflammatory bowel disease. *United European Gastroenterol J.* 2019;7:1189-1197.

20. Quatraccioni C, Annulli G, Daretti L, et al. P1105 Vedolizumab induces deep remission and improves quality of life in patients with inflammatory bowel diseases: the ANCONA experience. *United European Gastroenterol J.* 2019;7(S8):632.

21. Kashani A, Pabla B, Eaddy A. 796 Effect of disease location on endoscopic and radiographic outcomes in patients with moderate to severe Crohn's disease initiated on vedolizumab. *Am J Gastroenterol.* 2019;114:S460-461.

# PRISMA Checklist

| **Section/topic** | **#** | **Checklist item** | **Reported on page # of main manuscript (page # tbc vs proof version)** | |
| --- | --- | --- | --- | --- |
| **TITLE** | | |  | |
| Title | 1 | Identify the report as a systematic review, meta-analysis, or both. | 1 | |
| **ABSTRACT** | | |  | |
| Structured summary | 2 | Provide a structured summary including, as applicable: background; objectives; data sources; study eligibility criteria, participants, and interventions; study appraisal and synthesis methods; results; limitations; conclusions and implications of key findings; systematic review registration number. | 3 | |
| **INTRODUCTION** | | |  | |
| Rationale | 3 | Describe the rationale for the review in the context of what is already known. | 4 | |
| Objectives | 4 | Provide an explicit statement of questions being addressed with reference to participants, interventions, comparisons, outcomes, and study design (PICOS). | 4-5 | |
| **METHODS** | | |  | |
| Protocol and registration | 5 | Indicate if a review protocol exists, if and where it can be accessed (e.g., Web address), and, if available, provide registration information including registration number. | Yes. Access through data request | |
| Eligibility criteria | 6 | Specify study characteristics (e.g., PICOS, length of follow-up) and report characteristics (e.g., years considered, language, publication status) used as criteria for eligibility, giving rationale. | 6 | |
| Information sources | 7 | Describe all information sources (e.g., databases with dates of coverage, contact with study authors to identify additional studies) in the search and date last searched. | 6 Supplementary Tab 1-4 | |
| Search | 8 | Present full electronic search strategy for at least one database, including any limits used, such that it could be repeated. | 6 Supplementary Tab 1-4 | |
| Study selection | 9 | State the process for selecting studies (i.e., screening, eligibility, included in systematic review, and, if applicable, included in the meta-analysis). | 6  Table 1  Figure 1  Supplementary Table 6 | |
| Data collection process | 10 | Describe method of data extraction from reports (e.g., piloted forms, independently, in duplicate) and any processes for obtaining and confirming data from investigators. | 6 | |
| Data items | 11 | List and define all variables for which data were sought (e.g., PICOS, funding sources) and any assumptions and simplifications made. | 6 Table 1 | |
| Risk of bias in individual studies | 12 | Describe methods used for assessing risk of bias of individual studies (including specification of whether this was done at the study or outcome level), and how this information is to be used in any data synthesis. | 6 Supplementary Table 5 | |
| Summary measures | 13 | State the principal summary measures (e.g., risk ratio, difference in means). | 7 | |
| Synthesis of results | 14 | Describe the methods of handling data and combining results of studies, if done, including measures of consistency (e.g., I2) for each meta-analysis. | 7 | |
| Risk of bias across studies | 15 | Specify any assessment of risk of bias that may affect the cumulative evidence (e.g., publication bias, selective reporting within studies). | | Supplementary Table 5 | |
| Additional analyses | 16 | Describe methods of additional analyses (e.g., sensitivity or subgroup analyses, meta-regression), if done, indicating which were pre-specified. | | 7 | |
| **RESULTS** | | | |  | |
| Study selection | 17 | Give numbers of studies screened, assessed for eligibility, and included in the review, with reasons for exclusions at each stage, ideally with a flow diagram. | | 8  Figure 1 | |
| Study characteristics | 18 | For each study, present characteristics for which data were extracted (e.g., study size, PICOS, follow-up period) and provide the citations. | | 8  Table 2  Supplementary Table 6  Table 3 | |
| Risk of bias within studies | 19 | Present data on risk of bias of each study and, if available, any outcome level assessment (see item 12). | | 8-10  Quality assessment Supplementary Table 5 | |
| Results of individual studies | 20 | For all outcomes considered (benefits or harms), present, for each study: (a) simple summary data for each intervention group (b) effect estimates and confidence intervals, ideally with a forest plot. | | 8-10  Figures 2 and 3 | |
| Synthesis of results | 21 | Present results of each meta-analysis done, including confidence intervals and measures of consistency. | | 8-10  Figures 2 and 3 | |
| Risk of bias across studies | 22 | Present results of any assessment of risk of bias across studies (see Item 15). | | 8-10  Heterogeneity analysis Figure 2 and 3 | |
| Additional analysis | 23 | Give results of additional analyses, if done (e.g., sensitivity or subgroup analyses, meta-regression [see Item 16]). | | 8-10 | |
| **DISCUSSION** | | | |  | |
| Summary of evidence | 24 | Summarise the main findings including the strength of evidence for each main outcome; consider their relevance to key groups (e.g., healthcare providers, users, and policy makers). | | 11-12 | |
| Limitations | 25 | Discuss limitations at study and outcome level (e.g., risk of bias), and at review-level (e.g., incomplete retrieval of identified research, reporting bias). | | 12-13 | |
| Conclusions | 26 | Provide a general interpretation of the results in the context of other evidence, and implications for future research. | | 14 | |
| **FUNDING** | | | |  | |
| Funding | 27 | Describe sources of funding for the systematic review and other support (e.g., supply of data); role of funders for the systematic review. | | 2 | |
